# Supplementary material for: Attenuation of antigen-specific T helper 1 immunity by Neolitsea hiiranensis and its derived terpenoids
Source: PeerJ. 2016 Dec 7;4:e2758. doi: 10.7717/peerj.2758 (PMC5363408; doi:10.7717/peerj.2758)
Supplement: Data S1 [file peerj-04-2758-s002.xlsx]

## Sheet: Mice data
Day1 body weight				N. hiiranensis			Day9 body weight				N. hiiranensis
subject	NA	VH	subject	5 mg/kg	20 mg/kg		subject	NA	VH	subject	5 mg/kg	20 mg/kg
1	22.1	23.6	1	22	23.15		1	23.6	23.6	1	24	25.3
2	21.9	23.6	2	22.6	23.2		2	20.9	23.1	2	23.7	23.2
3	22.8	23.1	3	23.5	21.82		3	22.8	23.1	3	24.5	24.96
4	20.54	20.76	4	22.9	22.24		4	21.7	21.1	4	24.4	24.7
5	21.25	21.26	5	21.15	20.59		5	23.2	24.5	5	22.9	21.4
6	22.2	21.18	6	20.02	21.4		6	22.9	23.5	6	23	22.3
7	23.2	24.1	7	21.38	20.71		7	23.5	25.9	7	22.5	21.8
8	21.5	23.7	8	20.36	22.7		8	22.5	24.7	8	23.6	22.8
			9	22.3	24.1					9	24.3	24.5
			10	23.3	23.1					10	24.2	23.9
			11	22.7	24.9					11	24.7	25.6
Mean	21.94	22.66		22.02	22.54		Mean	22.64	23.69		23.8	23.68
Std. Error	0.3003	0.4795		0.3491	0.4069		Std. Error	0.3273	0.5002		0.2195	0.4406
Spleen weight (mg)				N. hiiranensis			Spleen Index				N. hiiranensis
subject	NA	VH	subject	5 mg/kg	20 mg/kg		subject	NA	VH	subject	5 mg/kg	20 mg/kg
1	98	122	1	106	106		1	4.15254	5.16949	1	4.41667	4.18972
2	90	96	2	111	88		2	4.30622	4.15584	2	4.68354	3.7931
3	82.6	101	3	102	88		3	3.62281	4.37229	3	4.16326	3.52564
4	86.5	102.9	4	92	106.7		4	3.98617	4.87678	4	3.77049	3.837
5	79.6	119.6	5	111.1	102.4		5	3.43104	4.88163	5	4.85153	4.31984
6	108.3	104.1	6	80.4	100.7		6	4.87838	4.42979	6	3.49565	4.78505
7	94.9	92.8	7	99.3	94.7		7	4.09052	3.85062	7	4.41333	4.5157
8	91.4	89.8	8	121.8	87.1		8	4.25116	3.78903	8	5.16102	4.34404
			9	84.7	84.3					9	3.79821	3.49792
			10	75.6	73.4					10	3.24464	3.17749
			11	84.4	78.6					11	3.71806	3.15663
Mean	91.41	103.5		97.12	91.81		Mean	4.09	4.441		4.156	3.922
Std. Error	3.23	4.155		4.462	3.362		Std. Error	0.1559	0.178		0.1819	0.1653

## Sheet: Serum antibody (Fig2)
OVA-IgM				N. hiiranensis			OVA-IgG1				N. hiiranensis
Subject	NA	VH	Subject	5 mg/kg	20 mg/kg		Subject	NA	VH	Subject	5 mg/kg	20 mg/kg
1	0.868	1.055	1	0.659	0.762		1	0.68	0.685	1	0.658	0.678
2	0.734	1.119	2	0.804	1.254		2	0	0.597	2	0.992	1.331
3	0.247	1.2	3	1.236	0.84		3	0.048	1.561	3	1.198	0.634
4	0.434	0.638	4	0.806	0.953		4	0.007	0.721	4	0.536	0.519
5	0.341	0.836	5	0.45	0.553		5	0.029635	0.495326	5	0.487993	0.641765
6	0.221	1.3	6	0.532	0.349		6	0.0182903	0.86286	6	0.45968	0.810692
7	0.229	1.002	7	0.609	0.779		7	0	0.509087	7	0.397357	0.5695
8	0.244	0.723	8	0.186	0.518		8	0	1.50414	8	0.251499	0.547212
			9	1.352	0.231
			10	0.421	0.278
			11	0.599	0.266
Mean	0.4148	0.9841		0.6958	0.6166		Mean	0.09787	0.8669		0.6226	0.7164
Std.Error	0.08889	0.08236		0.1039	0.09948		Std.Error	0.08338	0.1513		0.1126	0.09351
OVA-IgG2a				N. hiiranensis			Total IgE				N. hiiranensis
Subject	NA	VH	Subject	5 mg/kg	20 mg/kg		Subject	NA	VH	Subject	5 mg/kg	20 mg/kg
1	0.04	0.703	1	0.424	0.22		1	0.0757649	1.5113	1	1.62252	1.53601
2	0.024	1.162	2	0.163	0.116		2	0.0323514	1.30713	2	0.346005	0.182541
3	0.037	1.53077	3	0.330658	0.103958		3	0	0.372946	3	0.824918	0.801846
4	0.013	0.255537	4	0.178595	0.067114		4	0	1.03301	4	1.05924	1.04317
5	0.016759	0.7924	5	0.297517	0.123025		5	0.234412	0.431542	5	0.836283	1.35838
6	0.005787	0.240977	6	0.11216	0.172994		6	0.178483	1.38247	6	0.678559	1.25029
7	0.155359	0.284433	7	0.122727	0.057011					7	1.36292	1.60376
8	0.118977	0.235851	8	0.20067	0.108641					8	1.0414	1.4911
Mean	0.05136	0.6506		0.2287	0.1211		Mean	0.08684	1.006		0.9715	1.158
Std.Error	0.01946	0.1737		0.03912	0.01889		Std.Error	0.04015	0.2016		0.1406	0.1686

## Sheet: Cellularity (Table 1)
CD4+			N. hiiranensis			B220+			N. hiiranensis
replicate=4	NA	VH	5 mg/kg	20 mg/kg			NA	VH	5 mg/kg	20 mg/kg
	20.7	23.1	22.9	22		replicate=4	43.9	43.3	45.1	45.9
	20.4	21.9	21.4	21			44.5	44.4	44.1	45.7
	21.9	22.2	24	24.1			47.5	47.8	49.3	46.4
	21.2	23.2	24.5	23.3			47.5	46.2	46.3	46.5
Mean	21.05	22.6	23.2	22.6		Mean	45.85	45.43	46.2	46.13
Std. Error	0.3279	0.324	0.6868	0.6868		Std. Error	0.9605	0.9919	1.127	0.1931
CD8+			N. hiiranensis			CD11b+			N. hiiranensis
	NA	VH	5 mg/kg	20 mg/kg			NA	VH	5 mg/kg	20 mg/kg
replicate=4	9.86	11.8	13.3	11.8		replicate=4	2.02	1.86	2.28	2.41
	10.6	11.3	11.2	10.9			1.99	2.08	2.5	2.48
	9.64	10.8	12.8	11.5			2.88	3.14	2.84	2.35
	10.7	11.1	11.9	11.6			3.22	2.9	2.37	2.56
Mean	10.2	11.25	12.3	11.45		Mean	2.528	2.495	2.498	2.45
Std. Error	0.2644	0.2102	0.4673	0.1936		Std. Error	0.3096	0.3103	0.1228	0.04528

## Sheet: OVA-stimulate SPLC-MTT(Fig3)
Replicate N=8			N. hiiranensis			Replicate N=8			N. hiiranensis
	NA	VH	5 mg/kg	20 mg/kg			NA	VH	5 mg/kg	20 mg/kg
Non stimulate	0.048	0.037	0.042	0.053		OVA stimulate	0.165	0.253	0.257	0.243
	0.037	0.032	0.031	0.041			0.154	0.258	0.239	0.253
	0.041	0.041	0.041	0.049			0.168	0.268	0.23	0.253
	0.044	0.04	0.038	0.043			0.154	0.292	0.267	0.17
	0.056	0.071	0.1009	0.135			0.067	0.204	0.326	0.28
	0.075	0.076	0.172	0.078			0.077	0.147	0.329	0.283
	0.09	0.093	0.19	0.114			0.082	0.176	0.341	0.26
	0.074	0.086	0.192	0.104			0.087	0.22	0.394	0.309
Mean	0.05813	0.0595	0.1009	0.07713		Mean	0.1193	0.2273	0.2979	0.2564
Std. Error	0.006812	0.008675	0.02577	0.01287		Std. Error	0.01571	0.01749	0.02051	0.01446

## Sheet: OVA SPLC-cytokines (Fig3)
Replicate N=4			N. hiiranensis			Replicate N=4			N. hiiranensis				Replicate N=4			N. hiiranensis
	NA	VH	5 mg/kg	20 mg/kg			NA	VH	5 mg/kg	20 mg/kg				NA	VH	5 mg/kg	20 mg/kg
IL-2	155.942	207.562	243.892	153.72		IFN-r	0	5.281	3.427	2.144			IL-4	0	63	67	21
	259.473	254.64	214.641	115.356			0	5.014	3.351	2.391				0	74	82	42
	168.295	241.589	227.827	121.521			0	6.247	3.249	2.44				0	56	69	35
	152.237	208.712	263.675	183.277			0	4.584	4.105	2.949				0	64	57	81
Mean	184	228.1	237.5	143.5		Mean	0	5.282	3.533	2.481			Mean	0	64.25	68.75	44.75
Std. Error	25.4	11.85	10.58	15.71		Std. Error	0	0.3524	0.1941	0.1689			Std. Error	0	3.705	5.138	12.85
Replicate N=4			N. hiiranensis			Replicate N=4			N. hiiranensis
	NA	VH	5 mg/kg	20 mg/kg			NA	VH	5 mg/kg	20 mg/kg
IL-12p70	0.599091	22.9645	9.25364	15.45		IL-13	0	293.7	334.653	287.493
	0	21.8736	12.4582	8.15818			0	327.007	251.847	316.033
	0	12.2145	19.7827	1.47364			0	293.1	239.093	177.613
	0	20.6918	16.2927	8.31182			0	173.027	225.853	261.313
Mean	0.149773	19.4361	14.4468	8.34841		Mean	0	271.708	262.862	260.613
Std. Error	0.1498	2.452	2.288	2.854		Std. Error	0	33.83	24.51	29.84
