# Supplementary material for: Attenuation of antigen-specific T helper 1 immunity by Neolitsea hiiranensis and its derived terpenoids
Source: PeerJ. 2016 Dec 7;4:e2758. doi: 10.7717/peerj.2758 (PMC5363408; doi:10.7717/peerj.2758)
Supplement: Supplemental Information 1 [file peerj-04-2758-s003.xlsx]

## Sheet: MTT (Fig.5)
Replicate 8		Compounds
1	VH	1	2	3	4	5	6	7	8	9	10	11	12	13	14
	114.118	124.491	111.43	118.345	117.44	110.876	85.7729	87.7749	66.3772	110.311	57.6237	113.428	119.217	95.5005	85.6857
	107.78	113.149	115.019	118.785	113.298	121.568	78.6397	91.7072	76.0985	90.1009	84.6287	106.852	114.767	97.3075	73.445
	70.7092	117.704	120.386	123.544	113.567	104.957	98.5648	99.5115	78.9712	72.1977	99.3046	73.6872	116.127	96.1374	74.303
	107.393	111.262	115.682	104.979	110.332	102.005	99.9608	100.901	95.2278	85.99	100.803	117.176	111.242	100.548	80.5612
	93.0731	98.5315	108.906	88.8697	97.6658	119.6	101.892	108.19	99.4667	100.445	111.195	88.706	88.3907	105.686	109.346
	99.5866	112.206	105.231	99.355	88.708	108.321	99.2579	102.23	106.029	106.572	103.884	106.594	100.034	114.111	109.777
	103.145	96.2554	105.827	106.231	120.609	100.84	98.7385	102.326	104.098	102.563	109.51	107.716	99.2787	109.676	97.3667
	104.195	91.0371	100.664	97.7749	93.8319	93.3699	100.87	102.03	102.971	102.183	102.421	113.129	103.497	109.91	99.8654
Mean	100	108.1	110.4	107.2	106.9	107.7	95.46	99.33	91.15	96.3	96.17	103.4	106.6	103.6	91.29
Std. Error	4.721	4.089	2.294	4.263	4.19	3.372	2.995	2.304	5.35	4.469	6.2	5.218	3.723	2.542	5.23

## Sheet: IL-2  (Fig.5)
Replicate 8-12		Compounds
1	VH	1	2	3	4	5	6	7	8	9	10	11	12	13	14
	104.932	123.249	94.8902	66.9044	92.7588	50.5434	107.866	54.6462	118.448	101.396	91.7736	54.6462	94.8902	108.863	99.7477
	92.8638	117.073	65.5193	58.2104	97.163	72.9964	84.1202	61.3337	141.72	69.731	86.9108	69.3404	65.5193	135.424	108.652
	72.8592	107.407	98.5109	84.3941	118.728	64.9285	91.3428	112.332	107.87	90.8896	81.0207	101.663	98.5109	144.502	125.617
	126.028	98.5316	106.59	116.558	105.935	80.0819	52.3191	90.5483	123	91.9433	106.675	90.5483	106.59	127.525	132.875
	104.244	87.1147	71.7516	75.1583	58.2104	182.775	144.721	87.7413	70.8872	68.8627	84.6258	87.7413	71.7516	95.0862	108.574
	78.543	77.8946	69.0756	55.5158	143.802	118.201	176.873	41.0997	114.173	94.5493	122.478	41.0997	69.0756	82.931	62.2822
	104.445	67.3909	92.2709	143.802	75.1583	182.698	92.2709	89.9458	133.254	109.092	80.7565	129.65	70.3727	162.288	74.0989
	85.654	54.6976	137.053	46.4552	45.1214	92.6462	69.6562	105.288	122.433	78.3977	100.118	82.8173	106.545	126.981	74.0729
	126.466		91.3428	92.7588	66.9044		134.403	88.6761	46.1593	86.5674	57.7459		85.8202	132.673	56.7949
	112.516		123.341	97.163	55.5158		99.6496	75.9878	83.4017	72.5415	87.8971		111.395	69.6342	83.9219
	94.3549		85.6564	118.728	84.3941		109.75	133.613	91.9827	60.844	47.5332		196.844	115.335	100.614
	97.0936		111.472	105.935	116.558		146.113	119.137	55.9701	84.1324	89.2397		159.544	157.396	49.9344
Mean	100	91.67	95.62	88.47	88.35	105.6	109.1	88.36	100.8	84.08	86.4	82.19	103.1	121.6	89.77
Std. Error	4.839	8.561	6.261	8.524	8.574	18.24	10.29	7.842	8.919	4.167	5.731	9.77	11.37	8.229	7.798
														114.88
														113.614
														95.0862
														82.931
	76.8626
	168.768													51.5356
	82.0427													85.1302
	83.968													84.0055
														69.6342
	196.107
	165.873
	110.183
	78.148
	99.5394

## Sheet: IL-4  (Fig.5)
Replicate 8-12		Compounds
1	VH	1	2	3	4	5	6	7	8	9	10	11	12	13	14
	75.9277	69.4984	93.3238	85.4273	107.971	55.6474	78.6997	118.698	120.904	70.6393	64.4271	43.9965	104.282	93.7749	85.0565
	128.498	80.9362	113.376	74.6558	95.2736	64.075	59.7091	53.1957	131.808	52.9226	91.2964	120.13	57.1065	79.5816	81.4094
	83.6761	74.0259	46.4744	134.747	78.7906	54.3438	99.4455	54.155	54.193	65.4169	104.036	79.5721	75.2309	106.913	142.791
	87.643	85.0232	76.7507	65.3782	67.2361	53.9687	79.3811	85.035	137.41	38.5593	133.384	66.0338	83.3339	103.444	173.575
	97.0148	86.7268	111.895	68.4871	70.2331	95.3243	110.931	70.0013	57.0513	59.5347	78.3504	89.1086	65.0073	114.94	129.924
	100.997	91.3897	80.8269	70.0777	78.5862	81.3427	165.642	184.384	87.7697	161.308	86.9151	72.1074	68.7737	77.082	90.9311
	114.163	112.601	89.6459	62.0038	81.6841	77.9426	134.74	130.663	149.2	138.809	119.263	99.1094	62.3329	87.6498	84.8085
	94.2844	82.8133	97.5599	64.209	78.7906	82.8797	103.855	126.199	110.303	117.438	138.044	87.6498	80.1804	99.2271	95.1814
	84.7545		107.766				88.9008	117.025	104.122	96.9069	118.969		96.752
	124.403		58.7361				87.7616	132.469	85.8022	115.896	114.197		129.881
	87.0967		66.3694				115.352	114.94	79.2746	96.5917	149.886		103.884
	121.542		65.8366										113.392
Mean	100	85.38	84.05	78.12	82.32	70.69	102.2	107.9	101.6	92.18	109	82.21	86.68	95.33	110.5
Std. Error	5.158	4.603	6.312	8.499	4.703	5.572	8.846	11.83	9.576	11.62	8.03	8.053	6.588	4.71	12.08
														114.88
														113.614
														95.0862
														82.931
	76.8626
	168.768													51.5356
	82.0427													85.1302
	83.968													84.0055
														69.6342
	196.107
	165.873
	110.183
	78.148
	99.5394

## Sheet: IFN-r  (Fig.5)
Replicate 8-12		Compounds
1	VH	1	2	3	4	5	6	7	8	9	10	11	12	13	14
	111.123	119.18	61.0164	113.389	94.4466	96.9785	78.8856	89.7697	74.1625	106.143	89.802	121.28	83.0162	78.3664	120.323
	95.5155	77.6472	66.8858	112.648	79.7582	62.7822	98.7873	81.299	78.026	152.753	80.6809	98.4713	100.29	59.2828	104.752
	97.9107	154.836	78.0833	78.3162	104.336	102.558	100.415	75.6732	84.9784	125.867	84.8192	79.7854	103.333	45.9537	74.9405
	97.3234	137.862	78.8035	109.516	100.316	91.2844	97.9419	87.744	69.1758	127.64	79.2985	130.475	92.5089	71.8819	77.4664
	104.991	103.593	89.47	152.1	109.661	94.1986	115.849	77.4646	65.4918	113.62	87.5983	139.1	72.1886	84.0066	116.957
	92.5958	89.8608	93.2888	87.8713	62.7819	92.6474	111.795	71.2766	85.6564	121.757	92.8094	77.7748	95.6089	82.6743	142.161
	103.705	72.225	11.2317	99.6673	106.602	134.157	122.666	81.9458	69.537	126.811	101.832	85.0985	68.0491	58.7896	112.172
	115.507	91.1329	59.2619	134.026	97.3878	71.4174	150.618	94.5264	44.0226	119.802	94.0825	81.0382	122.102	58.9617	106.308
	92.6359		40.0045						72.3046	99.0798			86.4592	67.9505
	110.882		51.5004						40.2652	83.5475			70.7961	68.0001
	88.4254		18.6313						74.4042	136.581			96.9962	60.941
	89.3843		18.7353										88.0579	46.4722
Mean	100	105.8	55.58	110.9	94.41	93.25	109.6	82.46	68.91	119.4	88.87	101.6	89.95	65.27	106.9
Std. Error	2.624	10.36	8.135	8.411	5.572	7.54	7.533	2.754	4.414	5.629	2.633	8.84	4.467	3.638	7.843
														114.88
														113.614
														95.0862
														82.931
	76.8626
	168.768													51.5356
	82.0427													85.1302
	83.968													84.0055
														69.6342
	196.107
	165.873
	110.183
	78.148
	99.5394
